# Supplementary material
Source: PubMed Central journal article supplement (PMC6127385)
Supplement: rsta20170072supp2.pdf [file rsta20170072supp2.pdf]

**Table S1.**

Ancora

| top (ft) | bottom (ft) | Depth (m) <sup>a</sup> | Age relative to CIE (kyr) <sup>b</sup> | <i>Subbotina</i> B/Ca ( $\mu\text{mol/mol}$ ) | <i>Acarinina</i> B/Ca ( $\mu\text{mol/mol}$ ) | <i>Morozovella</i> B/Ca ( $\mu\text{mol/mol}$ ) |
|----------|-------------|------------------------|----------------------------------------|-----------------------------------------------|-----------------------------------------------|-------------------------------------------------|
| 525.4    | 525.5       | 160.16                 | 153                                    |                                               | 79                                            | 76                                              |
| 525.6    | 525.7       | 160.22                 | 152                                    |                                               | 68                                            | 65                                              |
| 525.6    | 525.7       | 160.22                 | 152                                    | 51                                            |                                               |                                                 |
| 532.2    | 532.3       | 162.23                 | 128                                    | 49                                            | 71                                            | 54                                              |
| 533.5    | 533.6       | 162.63                 | 124                                    | 47                                            | 57                                            | 60                                              |
| 533.5    | 533.6       | 162.63                 | 124                                    | 50                                            |                                               |                                                 |
| 534.5    | 534.6       | 162.93                 | 120                                    |                                               | 57                                            |                                                 |
| 535.4    | 535.5       | 163.19                 | 117                                    | 49                                            | 73                                            | 65                                              |
| 536.3    | 536.4       | 163.48                 | 113                                    | 51                                            | 78                                            | 55                                              |
| 536.3    | 536.4       | 163.48                 | 113                                    |                                               | 69                                            | 58                                              |
| 537.5    | 537.6       | 163.85                 | 109                                    | 49                                            | 80                                            | 59                                              |
| 537.5    | 537.6       | 163.85                 | 109                                    |                                               | 71                                            | 57                                              |
| 537.5    | 537.6       | 163.85                 | 109                                    |                                               | 75                                            |                                                 |
| 538      | 538.1       | 164.00                 | 107                                    | 47                                            | 62                                            | 59                                              |
| 539.3    | 539.4       | 164.39                 | 103                                    | 47                                            |                                               | 45                                              |
| 541.4    | 541.5       | 165.02                 | 95                                     | 48                                            | 60                                            |                                                 |
| 542.8    | 542.9       | 165.46                 | 87                                     |                                               | 55                                            | 52                                              |
| 542.8    | 542.9       | 165.46                 | 87                                     | 53                                            | 50                                            | 51                                              |
| 542.8    | 542.9       | 165.46                 | 87                                     |                                               | 52                                            |                                                 |
| 543.5    | 543.6       | 165.67                 | 70                                     | 51                                            | 55                                            | 54                                              |
| 543.9    | 544         | 165.80                 | 67                                     | 40                                            | 43                                            |                                                 |
| 544.4    | 544.5       | 165.95                 | 63                                     |                                               | 42                                            | 54                                              |
| 544.6    | 544.7       | 166.01                 | 62                                     | 40                                            | 37                                            |                                                 |
| 544.9    | 545         | 166.10                 | 60                                     | 38                                            | 43                                            | 48                                              |
| 545.4    | 545.5       | 166.24                 | 57                                     | 37                                            | 38                                            |                                                 |
| 550.2    | 550.3       | 167.72                 | 33                                     | 37                                            | 39                                            | 53                                              |
| 550.7    | 550.8       | 167.85                 | 32                                     | 37                                            | 36                                            | 49                                              |
| 551.6    | 551.7       | 168.14                 | 30                                     | 36                                            | 37                                            | 49                                              |
| 555.8    | 555.9       | 169.41                 | 18                                     | 41                                            | 38                                            |                                                 |
| 556      | 556.1       | 169.48                 | 18                                     | 37                                            | 39                                            | 52                                              |
| 556.4    | 556.5       | 169.59                 | 17                                     | 39                                            | 37                                            |                                                 |
| 556.9    | 557         | 169.76                 | 15                                     | 39                                            | 36                                            | 57                                              |
| 557.2    | 557.3       | 169.85                 | 14                                     |                                               | 37                                            |                                                 |

|       |       |        |     |    |    |    |
|-------|-------|--------|-----|----|----|----|
| 557.3 | 557.4 | 169.88 | 14  |    |    | 58 |
| 557.6 | 557.7 | 169.97 | 13  | 37 | 37 | 52 |
| 557.9 | 558   | 170.06 | 12  |    | 37 | 52 |
| 558.1 | 558.2 | 170.12 | 12  | 39 | 37 |    |
| 558.4 | 558.5 | 170.22 | 11  | 38 | 39 |    |
| 558.8 | 558.9 | 170.34 | 10  | 39 | 39 | 46 |
| 559.2 | 559.3 | 170.46 | 9   | 38 |    | 54 |
| 559.7 | 559.8 | 170.61 | 7   | 36 | 38 | 49 |
| 559.8 | 559.9 | 170.63 | 7   | 39 | 38 | 50 |
| 560   | 560.1 | 170.70 | 7   | 38 | 39 | 49 |
| 560.2 | 560.3 | 170.76 | 6   |    | 34 | 44 |
| 560.9 | 561   | 170.98 | 4   | 38 | 38 |    |
| 560.9 | 561   | 170.98 | 4   |    | 39 |    |
| 560.9 | 561   | 170.98 | 4   |    | 39 |    |
| 561.2 | 561.3 | 171.07 | 3   |    | 38 |    |
| 562.9 | 563   | 171.59 | -17 | 51 |    |    |
| 563.3 | 563.4 | 171.71 | -32 | 51 |    |    |

**Table S2.**

Site 689

| Depth (m) <sup>a</sup> | Age relative to CIE (kyr) <sup>b</sup> | <i>Acarinina</i> B/Ca (μmol/mol) | <i>Subbotina</i> B/Ca (μmol/mol) |
|------------------------|----------------------------------------|----------------------------------|----------------------------------|
| 204.3                  | 230                                    | 50                               | 42                               |
| 204.4                  | 225                                    |                                  | 35                               |
| 204.8                  | 208                                    | 51                               |                                  |
| 205.1                  | 195                                    | 48                               |                                  |
| 205.4                  | 152                                    | 48                               | 41                               |
| 207.3                  | 35                                     | 33                               | 23                               |
| 207.3                  | 34                                     | 31                               | 20                               |
| 207.4                  | 31                                     | 31                               |                                  |
| 207.5                  | 28                                     | 28                               | 30                               |
| 207.5                  | 27                                     | 28                               | 21                               |
| 207.6                  | 24                                     | 32                               | 20                               |
| 207.7                  | 22                                     | 26                               |                                  |
| 207.7                  | 21                                     | 27                               | 19                               |
| 207.7                  | 21                                     |                                  | 32                               |
| 207.7                  | 21                                     | 29                               |                                  |
| 207.9                  | 15                                     | 31                               |                                  |
| 207.9                  | 13                                     | 25                               |                                  |
| 208.0                  | 9                                      | 26                               |                                  |
| 208.1                  | 3                                      | 28                               |                                  |
| 208.1                  | 1                                      | 26                               |                                  |
| 208.1                  | 1                                      | 45                               | 34                               |
| 208.1                  | 1                                      | 31                               |                                  |
| 208.2                  | -2                                     | 29                               | 35                               |
| 208.2                  | -5                                     |                                  | 34                               |
| 208.4                  | -12                                    | 53                               | 36                               |
| 208.4                  | -13                                    | 51                               | 38                               |
| 208.5                  | -16                                    | 53                               |                                  |
| 208.5                  | -19                                    | 45                               | 34                               |
| 208.6                  | -23                                    | 52                               | 37                               |
| 208.6                  | -25                                    | 52                               | 46                               |
| 208.9                  | -36                                    | 46                               | 33                               |
| 209.2                  | -50                                    | 44                               | 42                               |

Site 690

| Depth (m) <sup>a</sup> | Age relative to CIE (kyr) <sup>b</sup> | <i>Acarinina</i> B/Ca (μmol/mol) | <i>Subbotina</i> B/Ca (μmol/mol) |
|------------------------|----------------------------------------|----------------------------------|----------------------------------|
| 167.8                  | 134.2                                  |                                  | 53                               |
| 168.8                  | 101.3                                  |                                  | 32                               |
| 168.9                  | 98.2                                   |                                  | 25                               |
| 169.0                  | 95.5                                   |                                  | 46                               |
| 169.0                  | 94.6                                   | 60                               |                                  |
| 169.1                  | 90.8                                   | 49                               |                                  |
| 169.3                  | 85.0                                   | 57                               |                                  |
| 169.3                  | 83.1                                   | 46                               |                                  |
| 169.4                  | 80.6                                   | 58                               | 58                               |
| 169.5                  | 77.1                                   | 57                               |                                  |
| 169.6                  | 71.2                                   | 43                               |                                  |
| 169.7                  | 61.8                                   | 48                               |                                  |
| 169.8                  | 56.2                                   | 49                               | 32                               |
| 169.9                  | 53.0                                   | 50                               | 27                               |
| 169.9                  | 53.0                                   | 39                               | 41                               |
| 169.9                  | 49.3                                   | 46                               |                                  |
| 170.0                  | 43.0                                   | 32                               | 32                               |
| 170.0                  | 43.0                                   |                                  | 37                               |
| 170.0                  | 43.0                                   |                                  | 47                               |
| 170.1                  | 37.1                                   | 34                               | 33                               |
| 170.2                  | 30.5                                   | 37                               | 32                               |
| 170.3                  | 24.5                                   | 36                               |                                  |
| 170.3                  | 21.9                                   | 30                               | 23                               |
| 170.4                  | 15.0                                   | 34                               | 34                               |
| 170.4                  | 15.0                                   | 31                               |                                  |
| 170.5                  | 9.4                                    | 26                               |                                  |
| 170.5                  | 9.4                                    | 27                               |                                  |
| 170.6                  | 2.5                                    | 36, 49 <sup>c</sup>              |                                  |
| 170.6                  | 2.5                                    | 34, 55 <sup>c</sup>              |                                  |
| 170.6                  | 1.1                                    | 41                               |                                  |
| 170.6                  | 0.4                                    |                                  | 50                               |
| 170.7                  | -0.1                                   | 29                               |                                  |
| 170.7                  | -0.1                                   | 32                               |                                  |
| 170.7                  | -2.7                                   | 45                               | 38                               |
| 170.7                  | -2.7                                   | 29                               | 62                               |

|       |       |                     |    |
|-------|-------|---------------------|----|
| 170.7 | -3.2  | 25                  |    |
| 170.8 | -8.4  | 33, 55 <sup>c</sup> | 39 |
| 170.8 | -8.4  | 43, 52 <sup>c</sup> |    |
| 170.9 | -14.0 |                     | 49 |
| 171.0 | -19.1 | 54                  | 45 |
| 171.1 | -24.3 |                     | 45 |
| 171.2 | -29.4 | 57                  | 47 |
| 171.2 | -29.4 | 58                  |    |
| 171.3 | -33.6 | 49                  | 44 |
| 171.3 | -34.0 |                     | 39 |
| 171.4 | -38.1 |                     | 39 |
| 171.4 | -38.6 | 54                  |    |
| 171.4 | -40.9 | 49                  |    |

**Table S3.**  
New Jersey

| Core site  | top (ft) | bottom (ft) | Depth (m) <sup>a</sup> | Age relative to CIE (kyr) <sup>b</sup> | Size fraction (μm) | Subbotina spp. δ <sup>11</sup> B | 2 s.e. |
|------------|----------|-------------|------------------------|----------------------------------------|--------------------|----------------------------------|--------|
| Bass River | 1183.85  | 1184.0      | 361                    | -356                                   | 180-300            | 13.87                            | 0.37   |
| Bass River | 1183.5   | 1183.7      | 361                    | -346                                   | 212-300            | 13.81                            | 0.49   |
| Bass River | 1183.5   | 1183.7      | 361                    | -346                                   | 180-212            | 12.95                            | 0.83   |
| Bass River | 1158.3   | 1158.5      | 353                    | 67                                     | 250-300            | 12.57                            | 0.26   |
| Bass River | 1158.3   | 1158.5      | 353                    | 67                                     | 212-250            | 12.42                            | 0.37   |
| Millville  | 888.0    | 888.5       | 271                    | 20                                     | 212-300            | 12.55                            | 0.30   |
| Millville  | 871.4    | 871.6       | 266                    | 55                                     | 212-300            | 12.80                            | 0.19   |
