# Supplementary material
Source: PubMed Central journal article supplement (PMC6127385)

Figure S1.

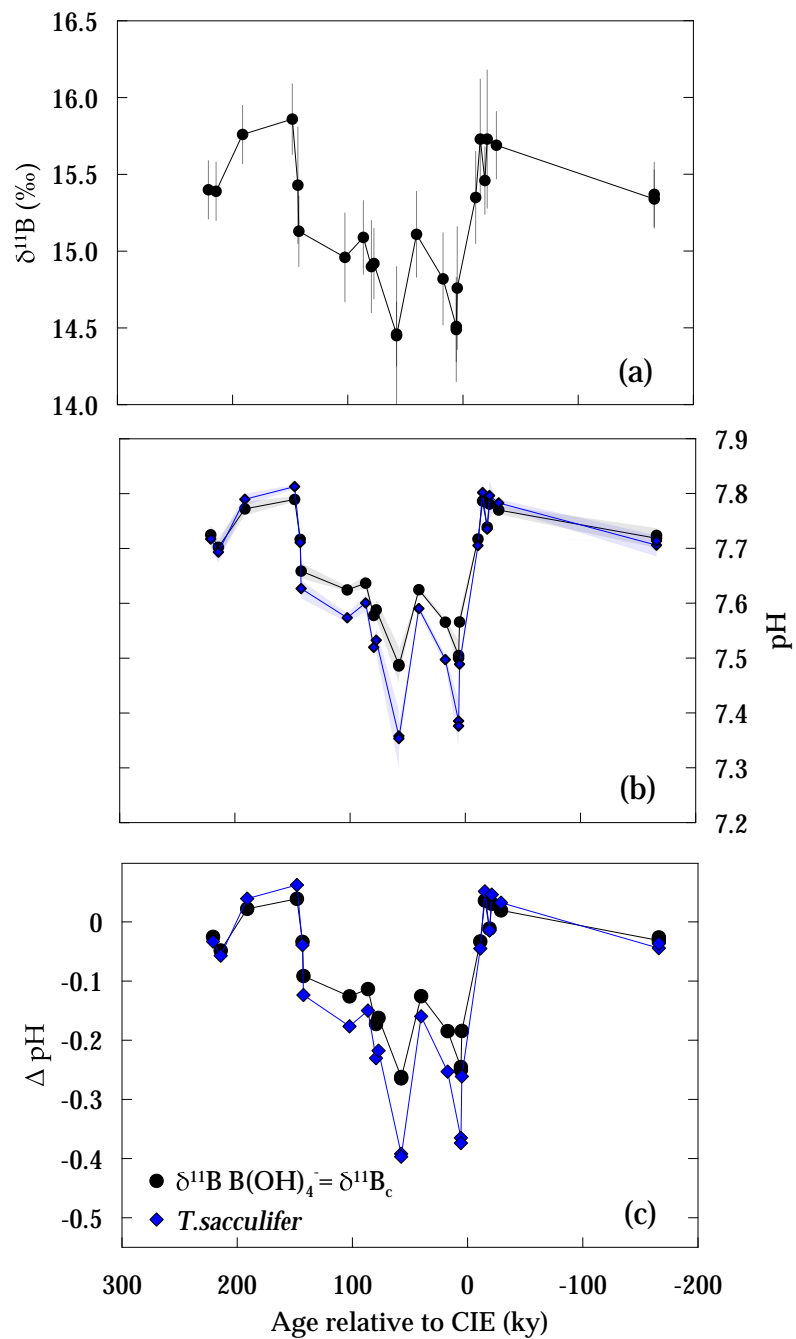

Supplement: rsta20170072supp3.pdf [file rsta20170072supp3.pdf]
